# Supplementary material for: Outcomes of Elderly Patients Undergoing Left Atrial Appendage Closure
Source: PubMed Central journal article supplement — J Am Heart Assoc. 2021 Sep 24;10(19):e021973. doi: 10.1161/JAHA.121.021973 (PMC8649147; doi:10.1161/jaha.121.021973), 2021-09-24
Supplement: JAH3-10-e021973-s001.pdf [file JAH3-10-e021973-s001.pdf]

# **SUPPLEMENTAL MATERIAL**

**Table S1. Charlson Comorbidity Index and ICD-10-CM codes.**

| Comorbidity                           | Points | ICD 10-CM codes                                                                                                                              |
|---------------------------------------|--------|----------------------------------------------------------------------------------------------------------------------------------------------|
| Myocardial infarction                 | 1      | I25.2                                                                                                                                        |
| Congestive heart failure              | 1      | I09.81, I25.5, I42.0, I42.5 - I42.9, I43.x, I50.x                                                                                            |
| Peripheral vascular disease           | 1      | I70.x, I71.x, I72.x, I73.1, I73.8, I73.9, I77.1, I77.7, I79.0, I79.1, I79.8, I79.2, K55.1, K55.8, K55.9, Z95.8, Z95.9                        |
| Cerebrovascular disease               | 1      | I69.x, Z86.73                                                                                                                                |
| Dementia                              | 1      | F01.5, F02.8, F03.9, G30.x, G31.1, G31.8, G31.9                                                                                              |
| Chronic pulmonary disease             | 1      | I27.8, I27.9, J40.x - J47.x, J60.x - J67.x, J68.4, J70.1, J70.3, J84, J96.1                                                                  |
| Rheumatic disease                     | 1      | L94.0, L94.1, L94.3, M05.x, M06.x, M08.x, M12.0, M12.3, M30.x, M31.0 - M31.3, M32.x - M35.x, M45.x, M46.5, M46.1, M46.8, M46.9, M48.8, M49.8 |
| Peptic ulcer disease                  | 1      | K25.5, K25.7, K25.9, K26.5, K26.7, K26.9, K27.5, K27.7, K27.9, K28.5, K28.7, K28.9                                                           |
| Mild liver disease                    | 1      | B18.x, K70.0 - K70.3, K70.9, K71.3 - K71.5, K71.7, K73.x, K74.x, K76.0, K76.0, K76.4, K76.8, K76.9, Z94.4                                    |
| Diabetes without chronic complication | 1      | E08.9, E09.9, E10.9, E11.9, E13.9                                                                                                            |
| Diabetes with chronic complication    | 2      | E08.2-E08.8, E09.x, E10.2 - E10.8, E11.2 - E11.8, E12.2 - E12.8, E13.2 - E13.8                                                               |
| Hemiplegia                            | 2      | G04.1, G11.4, G80.1, G80.2, G81.x, G82.x, G83.0 - G83.5, G83.8, G83.9, I69.x, R53.2                                                          |
| Renal disease                         | 2      | I12.0, I13.1, N18.x, N19.x, N25.0, Z49.0 - Z49.2                                                                                             |
| Cancer                                | 2      | C00.x - C26.x, C30.x - C34.x, C37.x - C41.x, C43.x, C45.x - C58.x, C60.x - C76.x, C81.x - C85.x, C88.x, C90.x - C96.x                        |
| Moderate or severe liver disease      | 3      | I85.0, I86.4, K72.1, K72.9, K76.5, K76.6, K76.7                                                                                              |
| Metastatic solid tumor                | 6      | C77.x - C80.x, R18.0                                                                                                                         |
| AIDS                                  | 6      | B20                                                                                                                                          |

ICD-10-CM: International Classification of Diseases, Tenth Revision, Clinical Modification. AIDS: acquired immune deficiency syndrome.

**Table S2. Elixhauser Classification System and ICD-10-CM codes.**

| <b>Comorbidity</b>                              | <b>Points</b> | <b>ICD-10-CM codes</b>                                                                                                                                                    |
|-------------------------------------------------|---------------|---------------------------------------------------------------------------------------------------------------------------------------------------------------------------|
| Congestive heart failure                        | 7             | I09.81, I25.5, I42.0, I42.5 - I42.9, I43.x, I50.x                                                                                                                         |
| Cardiac arrhythmias                             | 5             | I44.1 - I44.3, I45.6, I45.9, I47.x - I49.x, R00.0, R00.1, R00.8, Z95.0                                                                                                    |
| Valvular disease                                | -1            | A52.0, I05.x - I08.x, I09.1, I09.8, I34.x - I39.x, Q23.0 - Q23.3, Z95.2 - Z95.4                                                                                           |
| Pulmonary circulation disorders                 | 4             | I26.x, I27.x, I28.0, I28.8, I28.9                                                                                                                                         |
| Peripheral vascular disorders                   | 2             | I70.x, I71.x, I72.x, I73.1, I73.8, I73.9, I77.1, I77.7, I79.0, I79.1, I79.8, I79.2, K55.1, K55.8, K55.9, Z95.8, Z95.9                                                     |
| Hypertension                                    | 0             | I10.x, I11.x - I13.x, I15.x                                                                                                                                               |
| Paralysis                                       | 7             | G04.1, G11.4, G80.1, G80.2, G81.x, G82.x, G83.0 - G83.5, G83.8, G83.9, I69.x, R53.2                                                                                       |
| Neurodegenerative disorders                     | 6             | E75.0, E75.1, E75.2, E75.4, F84.2, G10.x - G13.x, G20.x - G21.x, G24.0, G24.2, G24.8, G25.4, G25.5, G30.0, G31.0, G31.1, G31.2, G31.8, G31.9, G32.8, G35.x - G37.x, G80.3 |
| Chronic pulmonary disease                       | 3             | I27.8, I27.9, J40.x - J47.x, J60.x - J67.x, J68.4, J70.1, J70.3, J84, J96.1                                                                                               |
| Diabetes, uncomplicated                         | 0             | E08.9, E09.9, E10.9, E11.9, E13.9                                                                                                                                         |
| Diabetes, complicated                           | 0             | E08.2-E08.8, E09.x, E10.2 - E10.8, E11.2 - E11.8, E12.2 - E12.8, E13.2 - E13.8                                                                                            |
| Hypothyroidism                                  | 0             | E00.x - E03.x                                                                                                                                                             |
| Renal failure                                   | 5             | I12.0, I13.1, N18.x, N25.0, Z49.0, Z49.3, Z91.1, Z99.2                                                                                                                    |
| Liver disease                                   | 11            | B18.x, I85.x, K70.x, K71.1, K71.3 - K71.5, K71.7, K72.x - K74.x, K75.4, K75.8, K76.0, K76.2 - K76.9, Z94.4                                                                |
| Peptic ulcer disease, no bleeding               | 0             | K25.5, K25.7, K25.9, K26.5, K26.7, K26.9, K27.5, K27.7, K27.9, K28.5, K28.7, K28.9                                                                                        |
| AIDS/HIV                                        | 0             | B20                                                                                                                                                                       |
| Lymphoma                                        | 9             | C81.x - C86.x, C88.x, C90.0, C90.2, C90.3, C96.x, D47.Z9                                                                                                                  |
| Metastatic cancer                               | 12            | C77.x - C80.x, R18.0                                                                                                                                                      |
| Solid tumor without metastasis                  | 4             | C00.x - C26.x, C30.x - C34.x, C37.x - C41.x, C43.x, C45.x - C58.x, C60.x - C76.x, D03.1-D03.9, E31.2                                                                      |
| Rheumatoid arthritis/collagen, vascular disease | 0             | L94.0, L94.1, L94.3, M05.x, M06.x, M08.x, M12.0, M12.3, M30.x, M31.0 - M31.3, M32.x - M35.x, M45.x, M46.5, M46.1, M46.8, M46.9, M48.8, M49.8                              |
| Coagulopathy                                    | 3             | D66 - D68.x, D69.1, D69.3 - D69.6                                                                                                                                         |

|                                  |    |                                                                       |
|----------------------------------|----|-----------------------------------------------------------------------|
| Obesity                          | -4 | E66.x, Z68.3, Z68.4, Z68.5                                            |
| Weight loss                      | 6  | E40.x - E46.x, R63.4, R63.6                                           |
| Fluid and electrolytes disorders | 5  | E22.2                                                                 |
| Blood loss anemia                | -2 | D50.0                                                                 |
| Deficiency anemia                | -2 | D501, D50.8, D50.9, D51.x - D53.x, D63.1, D63.8                       |
| Alcohol misuse                   | 0  | F10, E52, G62.1, I42.6, K29.2, K70.0, K70.3, K70.9, T51.x, Z71.4      |
| Drug abuse                       | -7 | F11.x - F16.x, F18.x, F19.x, Z71.5                                    |
| Psychosis                        | 0  | F20.x, F22.x - F25.x, F28.x, F29.x, F30.1, F30.2, F31.2, F31.6, F44.8 |
| Depression                       | -3 | F20.4, F31.3 - F31.5, F32.x, F33.x, F34.1, F41.2, F43.2               |

ICD-10-CM: International Classification of Diseases, Tenth Revision, Clinical Modification. AIDS/HIV: acquired immune deficiency syndrome and human immunodeficiency virus infection.

**Table S3. 10-CM codes for in-hospital major adverse events.**

| Adverse Events                                             | ICD-10-CM codes                                                                                                                                                                                                                                                                                                                                                                                                                                                                                                                                                                                                                                                                                                                                                                                                                                                                                                                                                                                                                                                                                                                                                                                                                                                                                                                                                                                                                                                        |
|------------------------------------------------------------|------------------------------------------------------------------------------------------------------------------------------------------------------------------------------------------------------------------------------------------------------------------------------------------------------------------------------------------------------------------------------------------------------------------------------------------------------------------------------------------------------------------------------------------------------------------------------------------------------------------------------------------------------------------------------------------------------------------------------------------------------------------------------------------------------------------------------------------------------------------------------------------------------------------------------------------------------------------------------------------------------------------------------------------------------------------------------------------------------------------------------------------------------------------------------------------------------------------------------------------------------------------------------------------------------------------------------------------------------------------------------------------------------------------------------------------------------------------------|
| <b>Post procedural hemorrhage</b>                          | D7821, D7822, D7831, D7832, E89810, E89811, E89820, E89821, G9751, G9752, G9761, G9762, H59311, H59312, H59313, H59319, H59321, H59322, H59323, H59329, H59331, H59332, H59333, H59339, H59341, H59342, H59343, H59349, H9541, H9542, H9551, H9552, I97610, I97611, I97618, I9762, I97620, I97621, I97630, I97631, I97638, J95830, J95831, J95860, J95861, K91840, K91841, K91870, K91871, L7621, L7631, M96830, M96840, N99820, N99821, N99840, N9984                                                                                                                                                                                                                                                                                                                                                                                                                                                                                                                                                                                                                                                                                                                                                                                                                                                                                                                                                                                                                 |
| <b>Cardiac complications</b>                               | I2101, I2102, I2109, I2111, I2119, I2121, I2129, I213, I214, I219, I21A1, I21A9, I220, I221, I222, I228, I229, I469, I97710, I97790, I9788, I9789, I312, I314, I442, 0W9D30Z, 0W9D3ZX, 0W9D3ZZ, 0W9D40Z, 0W9D4ZX, 0W9D4ZZ, 02HK3JZ, 02HK3MZ, 02HL3JZ, 02HL3MZ, 02H63JZ, 02H73JZ, 02HK3JZ, 02HL3JZ, 5A1213Z, 5A1223Z, 0JH60PZ, 0JH60PZ, 0JH63PZ, 0JH63PZ, 0JH80PZ, 0JH80PZ, 0JH83PZ, 0JH83PZ, 0JH604Z, 0JH634Z, 0JH804Z, 0JH834Z, 0JH605Z, 0JH635Z, 0JH805Z, 0JH835Z, 0JH606Z, 0JH636Z, 0JH806Z, 0JH836Z, T8111XA, 028D0ZZ, 02QD0ZZ, 02890ZZ, 02Q90ZZ, 02QF0ZZ, 02QG0ZZ, 02QH0ZZ, 02QJ0ZZ, 02BK0ZZ, 02NK0ZZ, 02NL0ZZ, 02QF0ZZ, 02QA0ZZ, 02B50ZZ, 02RM0JZ, 02U50JZ, 02UM0JZ, 02U50JZ, 02RM0JZ, 02UM0JZ, 02QF0ZZ, 02QG0ZZ, 02QH0ZZ, 02QJ0ZZ, 02U50JZ, 02UM0JZ, 02RM07Z, 02RM0KZ, 02U507Z, 02U508Z, 02U50KZ, 02UM07Z, 02UM0KZ, 02U507Z, 02U508Z, 02U50KZ, 02RM07Z, 02RM0KZ, 02UM07Z, 02RK07Z, 02RK0KZ, 02RL07Z, 02RL0KZ, 02U607Z, 02U608Z, 02U707Z, 02U708Z, 02U70KZ, 02UK0KZ, 02UL0KZ, 02Q50ZZ, 02QM0ZZ, 02Q50ZZ, 02QM0ZZ, 02QB0ZZ, 02QC0ZZ, 02U50JZ, 021609P, 021609Q, 021609R, 02160AP, 02160AQ, 02160AR, 02160JP, 02160JQ, 02160JR, 02160KP, 02160KQ, 02160KR, 02160ZP, 02160ZQ, 02160ZR, 02W50JZ, 02WF07Z, 02WF08Z, 02WF0JZ, 02WF0KZ, 02WG07Z, 02WG08Z, 02WG0JZ, 02WG0KZ, 02WH07Z, 02WH08Z, 02WH0JZ, 02WH0KZ, 02WJ07Z, 02WJ08Z, 02WJ0JZ, 02WJ0KZ, 02WM0JZ, 02Q50ZZ, 02QM0ZZ, 021K0Z5, 021L0Z5, 02B60ZZ, 02B70ZZ, 02BK0ZZ, 02BL0ZZ, 02B60ZZ, 02B70ZZ, 02BK0ZZ, 02BL0ZZ |
| <b>Post-procedural stroke or transient ischemic attack</b> | I6322, I63139, I63239, I63019, I63119, I63219, I6359, I6359, I6320, I6330, I6340, I6350, I6300, I63011, I63012, I63019, I6302, I63031, I63032, I63039, I6309, I6320, I63211, I63212, I63219, I63549, I6359, I638, I639, H3400, H3401, H3402, H3403, H3410, H3411, H3412, H3413, H34211, H34212, H34213, H34219, H34231, H34232, H34233, H34239, G450, G451, G458, G459, G9781, G9782, I97811, I97821                                                                                                                                                                                                                                                                                                                                                                                                                                                                                                                                                                                                                                                                                                                                                                                                                                                                                                                                                                                                                                                                   |
| <b>Vascular complications</b>                              | T1490, D7811, D7811, D7812, E3611, E3612, G9748, G9749, H59219, H59229, H9531, H9532, I9751, I9752, J957, J9572, K9171, K9172, L7611, L7612, M96820, M96821, N9971, N9972, T888XXA, S15009A, S15309A, S15209A, S158XXA, S090XX, S158XXA, S159XXA, S2500XA, S25109A, S2520XA, S25309A, S25409, S25409A, S25509A, S25809A, S2590XA, S3500XA, S3510XA, S35299A, S35219A, S35229A, S35239A, S35339A, S35349A, S35319A, S35329A, S358X9A, S35403A, S35406A, S35516A, S35513A, S35533A, S35536A, S3559XA, S358X9A, S3590XA, S45809A, S45009A, S45209A, S45109A, S55109A, S65109A, S55009A, S65009A, S65209A, S65309A, S65409A, S65509A, S45809A, S55809A, S65809A, S45909A, S55909A, S65909A, S75009A, S75109A, S75209A, S85309A, S85409A, S85009A, S85509A, S85109A, S85139A, S85809A, S85169A, S95109A, S75809A, S95809A, S75909A, S85909A, S95902A                                                                                                                                                                                                                                                                                                                                                                                                                                                                                                                                                                                                                        |
| <b>Acute kidney injury</b>                                 | N170, N171, N172, N178, N179, N990, R34                                                                                                                                                                                                                                                                                                                                                                                                                                                                                                                                                                                                                                                                                                                                                                                                                                                                                                                                                                                                                                                                                                                                                                                                                                                                                                                                                                                                                                |

ICD-10-CM: International Classification of Diseases, Tenth Revision, Clinical Modification.
